# Supplementary material for: Extracellular Vesicles Derived-LAT1 mRNA as a Powerful Inducer of Colorectal Cancer Aggressive Phenotype
Source: MDPI journal article supplement (doi:10.3390/biology11010145), 2022-01-15
Supplement: s1 [file s1]

## Supplementary Material

### *Extracellular vesicles derived-LAT1 mRNA as a powerful inducer of colorectal cancer aggressive phenotype*

Cristina Almeida <sup>1,\*</sup>, Ana Luísa Teixeira <sup>1,3,\*</sup>, Francisca Dias<sup>1</sup>, Vera Machado <sup>1</sup>,  
Mariana Moraes <sup>1</sup>, Gabriela Martins <sup>4</sup>, Carlos Palmeira <sup>4,5,6</sup>, Sílvia Batista <sup>7</sup>, Bruno Costa-Silva <sup>7</sup>  
and Rui Medeiros <sup>1,2,3,6,7,8</sup>

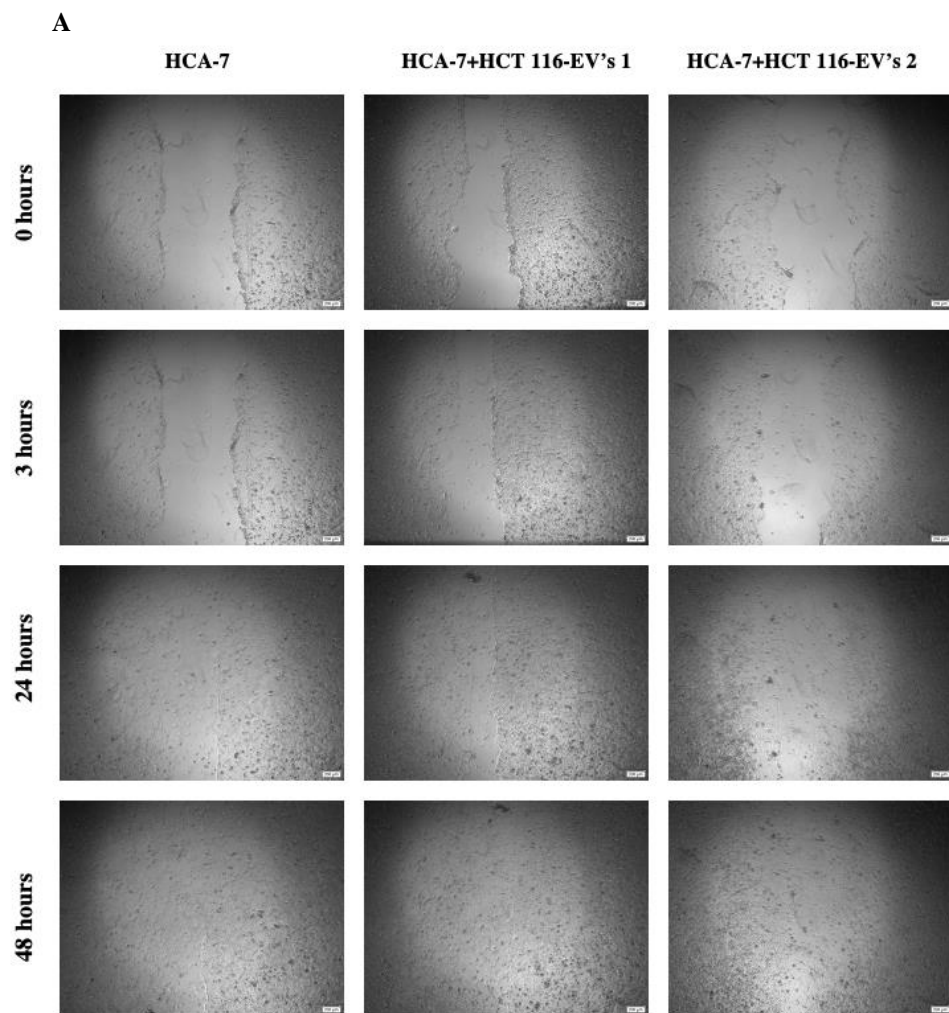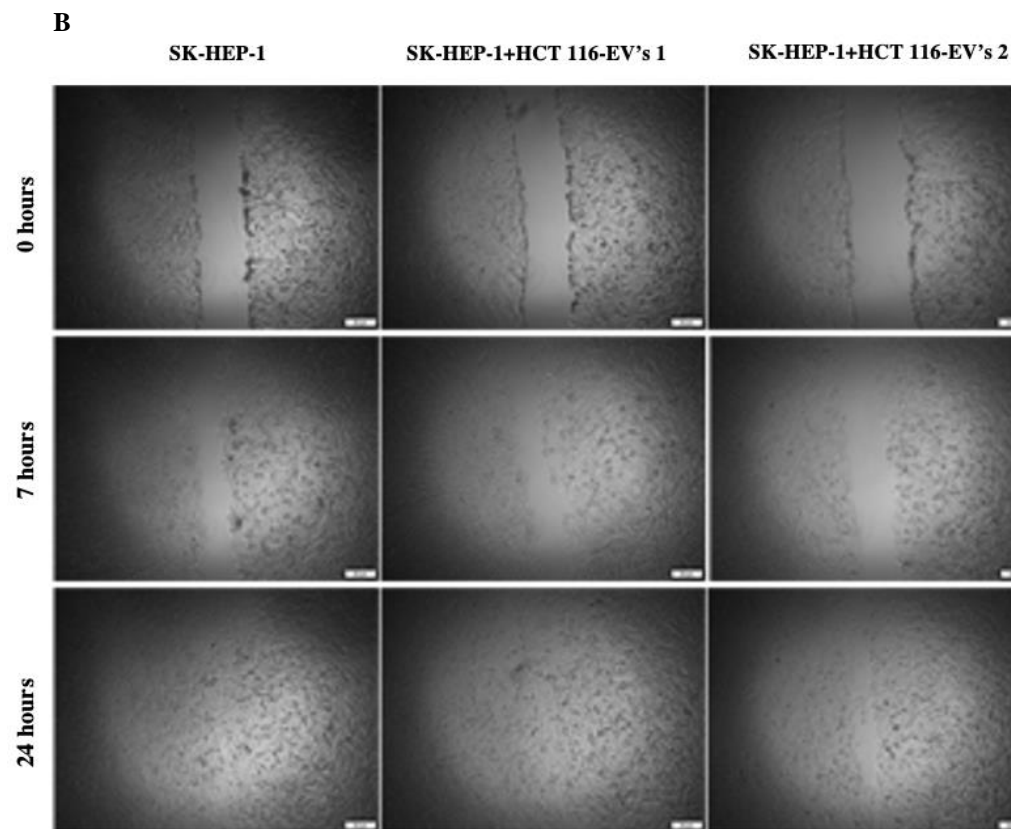

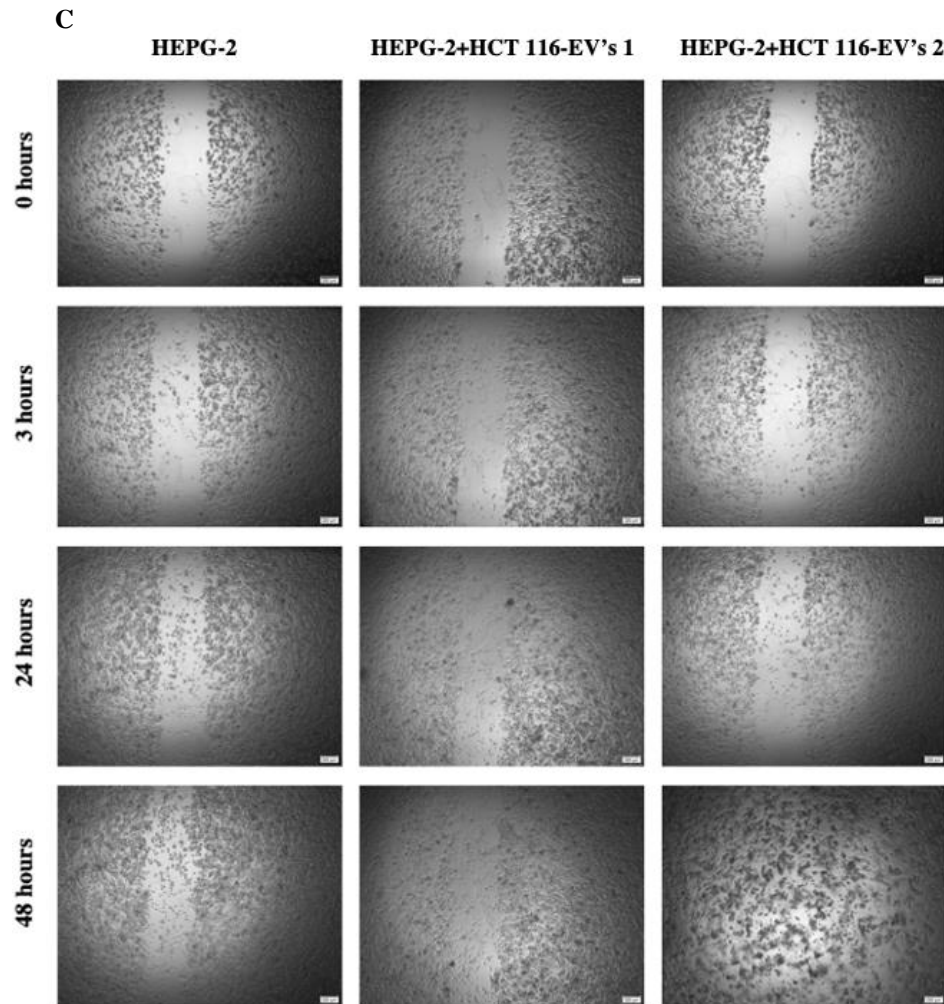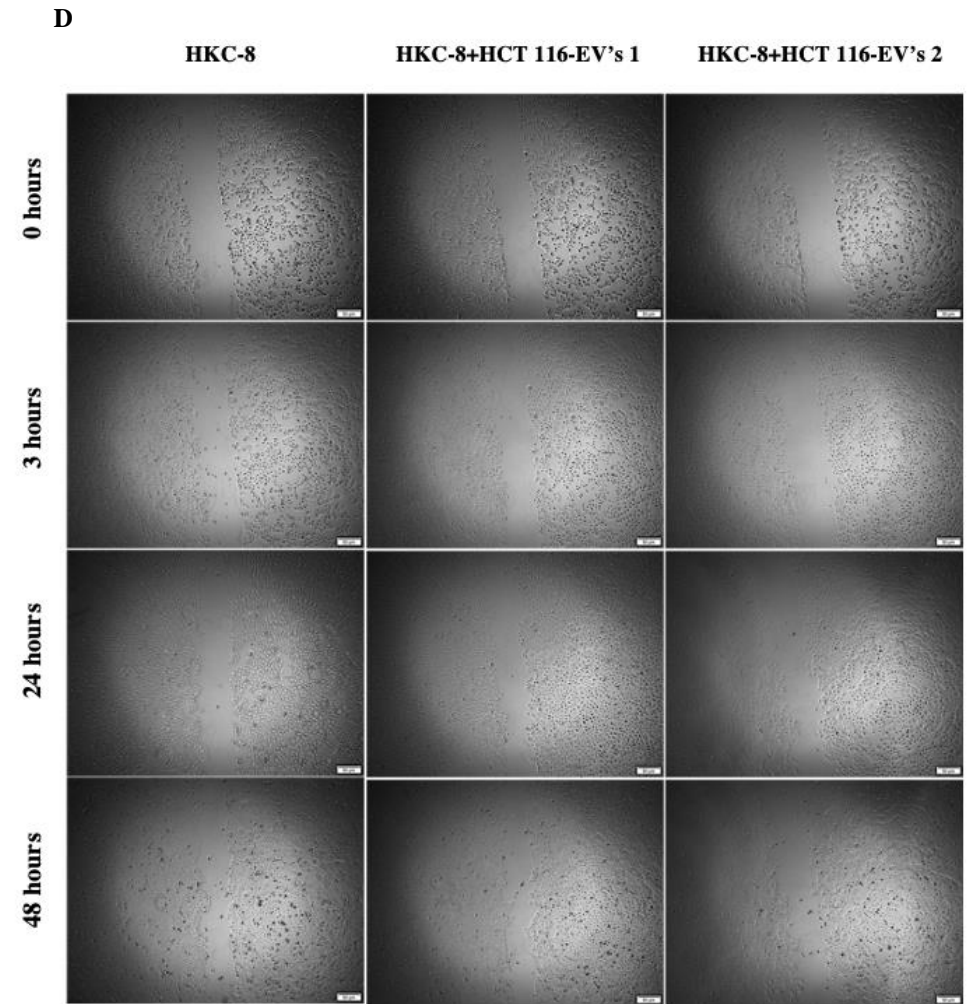

**Figure Supplementary 1.** Representative images of wound healing assay in (A) HCA-7, (B) SK-HEP-1, (C) HEPG-2 and (D) HKC-8 recipient cells, with respective uptakes of HCT 116-EV's (1 and 2), in the different time points. (A) and (B) Scale bar = 200  $\mu$ m.

A

LAT1

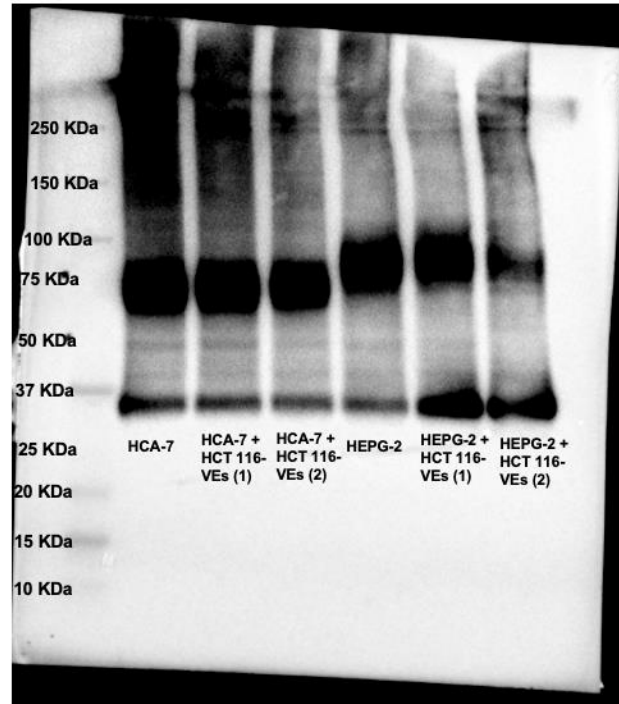

ASCT2

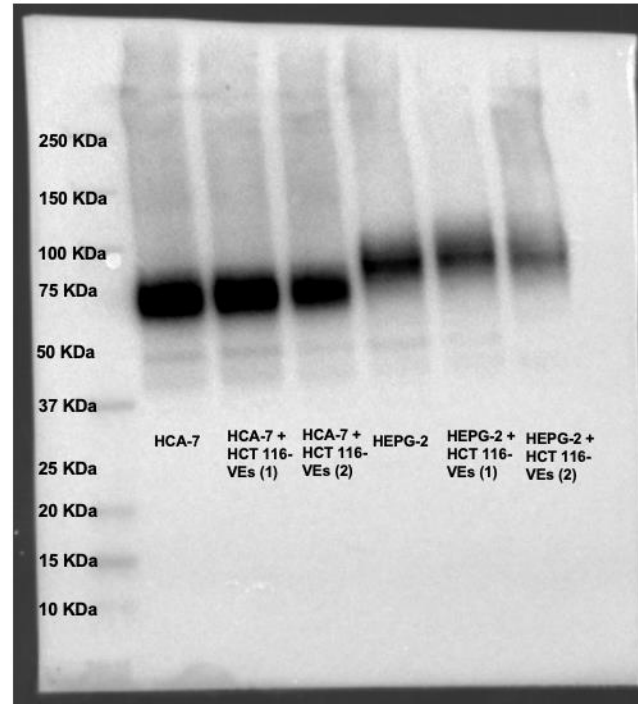

GAPDH

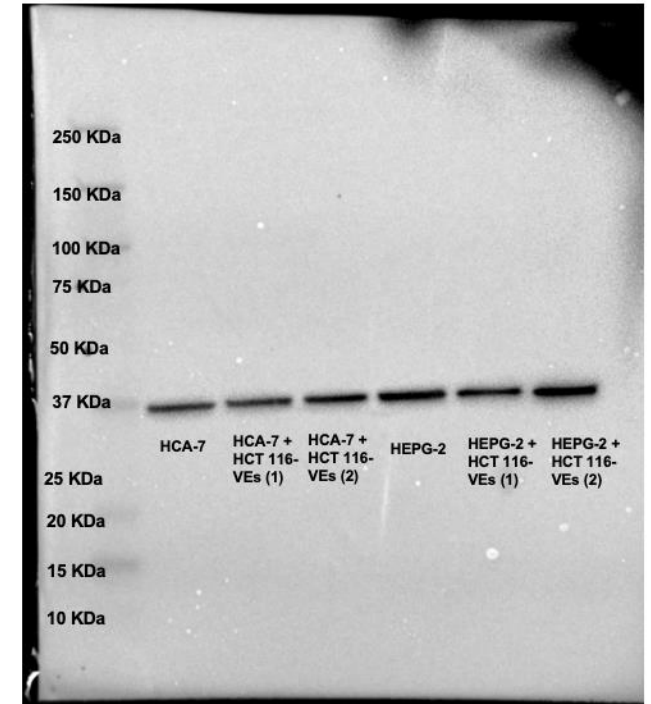

B

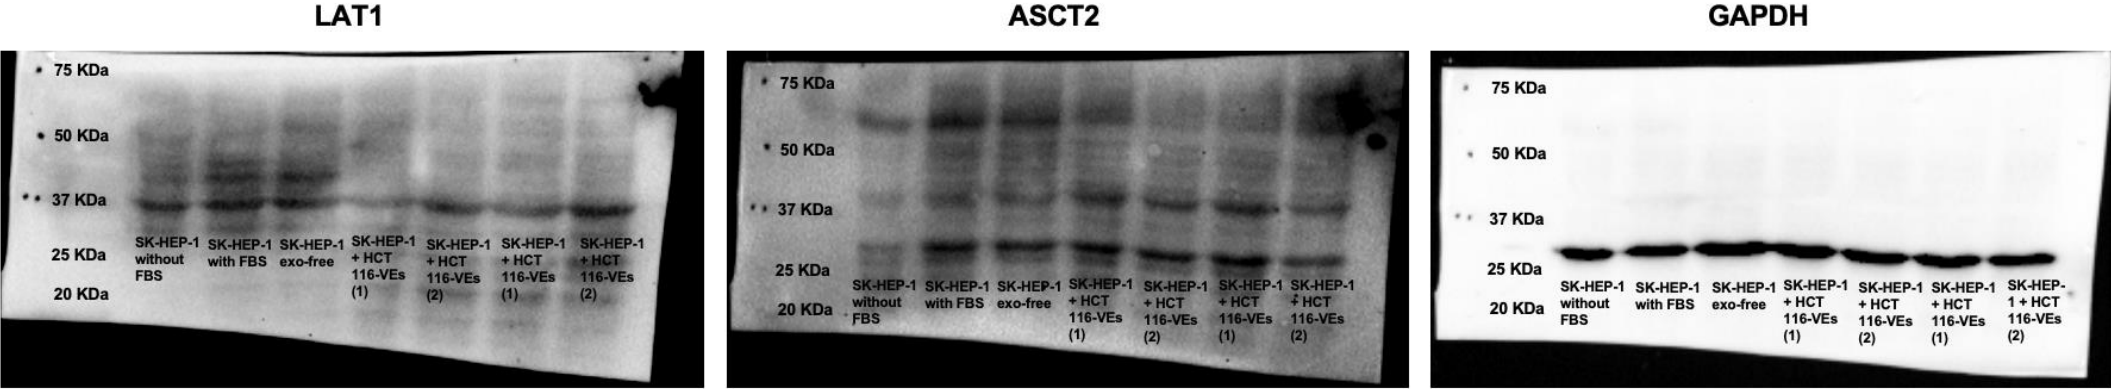

C

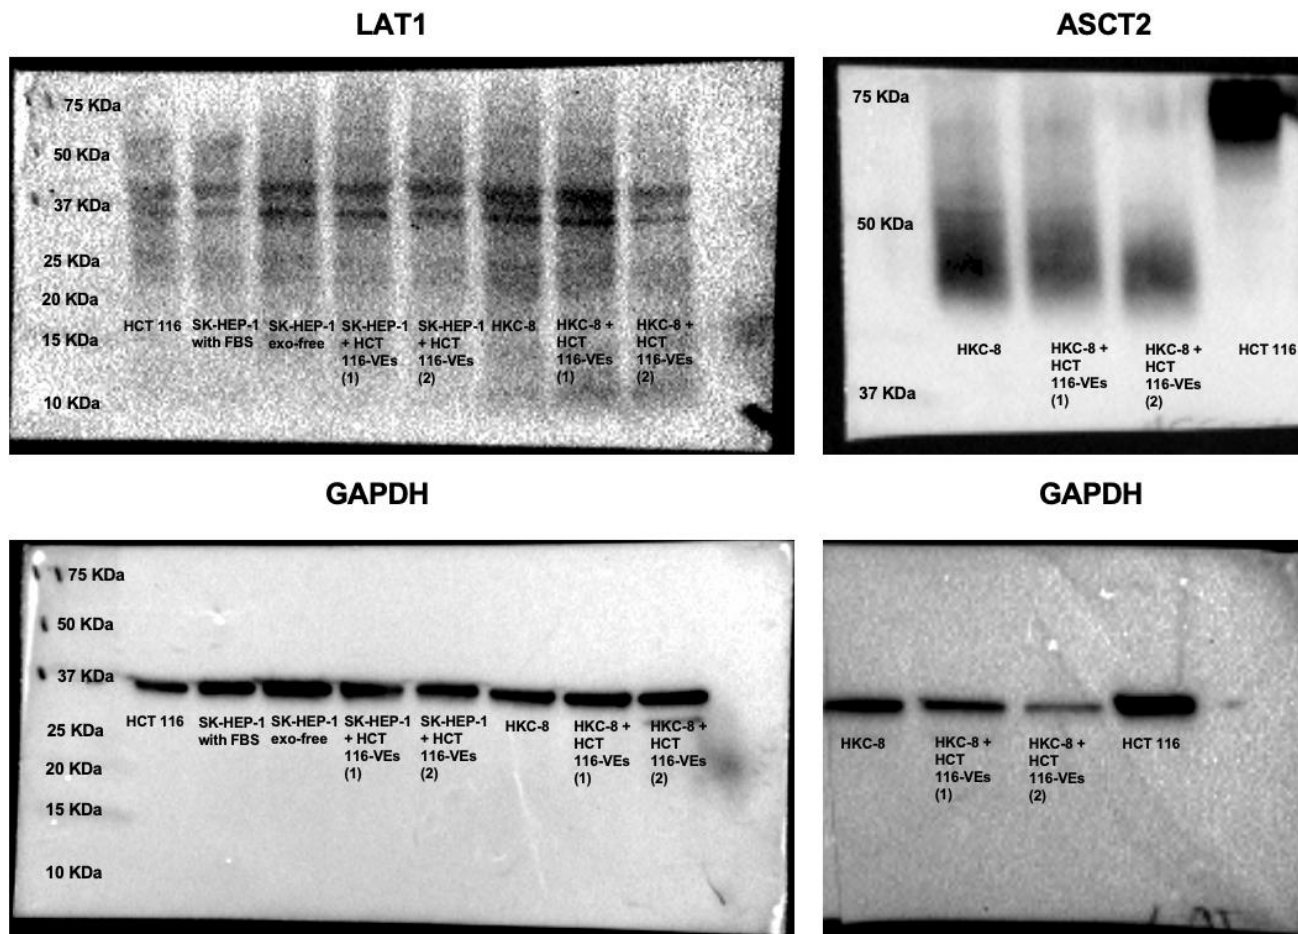

**Figure Supplementary 2.** Representative original images of Western Blot assay in **A)** HCA-7, HEPG-2, **B)** SK-HEP-1 and **C)** HKC-8 recipient cells, with respective uptakes of HCT 116-EV's (1 and 2).
